# Supplementary material for: Thermodynamics, dynamics, and structure of supercritical water at extreme conditions
Source: Royal Society of Chemistry journal article supplement (doi:10.1039/d0cp02288h), 2020-01-01
Supplement: d0cp02288h1.pdf [file d0cp02288h1.pdf]

## Electronic Supplementary Information for the article “Thermodynamics, dynamics, and structure of supercritical water at extreme conditions”

Tae Jun Yoon, Lara A. Patel, Taeho Ju, Matthew J. Vigil, Alp T. Findikoglu, Robert P. Currier, and Katie A. Maerzke  
Los Alamos National Laboratory, Los Alamos, NM 87545

This Electronic Supplementary Information (ESI) provides (1) the number of hydrogen bonds (HBs) per molecule from a single distance criterion ( $r_{O\dots H} < 2.2 \text{ \AA}$ ); (2) the timestep validation results; (3) the influence of the bond flexibility on the dynamic behavior of supercritical water; and (4) numerical data obtained from the two-phase thermodynamic (2PT) model and structural parameters of the TIP4P/2005 water model.

### A. The number of hydrogen bonds (HBs) from a single distance criterion

Fig. S1 shows that the number of HBs per molecule from a single distance criterion ( $r_{O\dots H} < 2.2 \text{ \AA}$ ) is almost identical to that obtained from the electron structure criterion. This result suggests that the normal vector criterion used to define  $\langle n_{\text{HB}}^E \rangle$  does not readily reflect the orientational changes in the supercritical region.

### B. Effect of the simulation timestep

We additionally perform a set of TIP4P/2005 simulations along an isotherm ( $T_r = 1.0$  and  $\rho_r = 0.1 - 6.1$ ) to validate that the timestep of  $\Delta t = 1.0$  fs is sufficiently short to keep track of the dynamic behavior of supercrit-

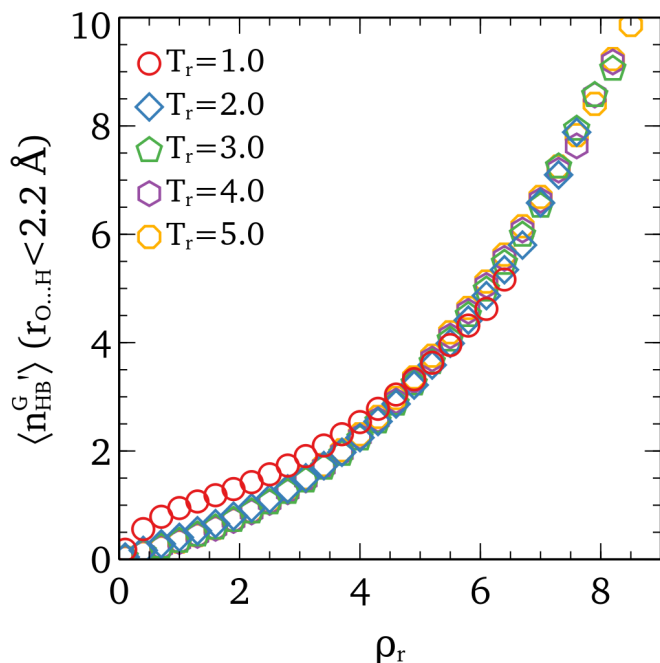

FIG. S1. The numbers of hydrogen bonds per molecule ( $\langle n_{\text{HB}} \rangle$ ) using only the OH distance criterion ( $r_{O\dots H} < 2.2 \text{ \AA}$ ). For all temperatures, it is almost identical to that obtained from the electron energy criterion [Fig. 7 (a) in the main article].

TABLE S1. Influence of the timestep selection in the TIP4P/2005 simulations at  $T_r = 1.0$ . The symbols  $f_g^m$  and  $f_g^r$  indicate the fluidicity data obtained from  $\Delta t = 1.0$  fs and  $\Delta t = 0.5$  fs, respectively. No significant discrepancy of the fluidicity data is observed.

| $\rho$   | $f_g^t$ | $f_g^r$ | $f_g^m$ | $f_g^r$ |
|----------|---------|---------|---------|---------|
| 28.423   | 0.938   | 0.942   | 0.716   | 0.711   |
| 198.961  | 0.792   | 0.792   | 0.332   | 0.331   |
| 369.499  | 0.738   | 0.740   | 0.255   | 0.254   |
| 540.037  | 0.697   | 0.695   | 0.217   | 0.216   |
| 710.575  | 0.647   | 0.643   | 0.193   | 0.192   |
| 881.113  | 0.580   | 0.589   | 0.180   | 0.177   |
| 1051.651 | 0.505   | 0.509   | 0.167   | 0.166   |
| 1222.189 | 0.421   | 0.422   | 0.158   | 0.155   |
| 1392.727 | 0.311   | 0.320   | 0.148   | 0.151   |
| 1563.265 | 0.208   | 0.209   | 0.141   | 0.144   |
| 1733.803 | 0.015   | 0.014   | 0.158   | 0.161   |

TABLE S2. Comparison of absolute entropy and fluidicity data at 298.15 K and  $1,000 \text{ kg/m}^3$  calculated from the 2PT method for the TIP4P/2005 and the SPC/Fw water models. The intramolecular vibrational entropy cannot be calculated for the TIP4P/2005 model since it is treated as a rigid body in the simulations.

| Property        | TIP4P/2005 | SPC/Fw |
|-----------------|------------|--------|
| $f_g^t$         | 0.227      | 0.236  |
| $f_g^r$         | 0.044      | 0.052  |
| $S^t$ [J/mol K] | 52.312     | 46.014 |
| $S^r$ [J/mol K] | 6.835      | 12.321 |
| $S^v$ [J/mol K] | n/a        | 0.110  |
| $S$ [J/mol K]   | 59.147     | 58.445 |

ical water. Table S1 shows that both fluidicity data ( $f_g^t$  and  $f_g^r$ ) from  $\Delta t = 1$  fs simulations agree well with those from  $\Delta t = 0.5$  fs ( $f_g^t$  and  $f_g^r$ ). Moreover, it should be noted that the Frenkel line (FL) from the  $Z(t)$  criterion obtained in this work agrees well with that proposed by Yang et al. and Fomin et al. Since Fomin et al. used the timestep of  $\Delta t = 0.1$  fs, the consistency of the FL indicates that the simulation timestep of  $\Delta t = 1$  fs is sufficiently short to obtain a variety of thermodynamic properties as well as to locate the dynamic crossover within the studied thermodynamic conditions.

TABLE S3. Symbols and their description used in Table S4 and S5.

| Symbol                      | Unit                | Description                                       |
|-----------------------------|---------------------|---------------------------------------------------|
| $n_{\text{HB}}$             | -                   | Average number of HBs per molecule                |
| $n_{\text{HB}}^{\text{E}}$  | -                   | $n_{\text{HB}}$ from the Kumar criterion          |
| $n_{\text{HB}}^{\text{G}}$  | -                   | $n_{\text{HB}}$ from the distance-angle criterion |
| $n_{\text{HB}}^{\text{G}'}$ | -                   | $n_{\text{HB}}$ from the distance criterion       |
| $\langle q \rangle$         | -                   | Average orientational tetrahedral order           |
| $f_{\text{FCC-HCP}}$        | -                   | The fraction of FCC and HCP types                 |
| $f_{\text{g}}^{\text{t}}$   | -                   | Translational fluidicity                          |
| $f_{\text{g}}^{\text{r}}$   | -                   | Rotational fluidicity                             |
| $T_{\text{r}}$              | -                   | Reduced temperature ( $= T/T_{\text{c}}$ )        |
| $T_{\text{c}}$              | K                   | Critical temperature (TIP4P/2005)                 |
| $\rho$                      | kg/m <sup>3</sup>   | Bulk density                                      |
| $p$                         | bar                 | Pressure                                          |
| $E$                         | kJ/mol              | Internal energy                                   |
| $H$                         | kJ/mol              | Enthalpy                                          |
| $S$                         | kJ/mol K            | Entropy                                           |
| $A$                         | kJ/mol              | Helmholtz free energy                             |
| $G$                         | kJ/mol              | Gibbs free energy                                 |
| $D_{\text{t}}$              | m/s <sup>2</sup>    | Translational diffusivity                         |
| $D_{\text{r}}$              | rad/ps <sup>2</sup> | Rotational diffusivity                            |

### C. Influence of the bond flexibility on the dynamic crossover

The TIP4P/2005 water model is one of the best rigid nonpolarizable water models that can represent a variety of thermophysical properties well.<sup>1</sup> However, the model does not reflect the high polarizability of water as well as the charge transfer effect, which are important in aqueous electrolyte solutions. The polarizability of a molecule can be implicitly reflected in a water model by introducing bond and angle flexibility. To examine the influence of bond flexibility on the dynamic behavior of water, we perform a series of MD simulations using the SPC/Fw water model under different conditions.<sup>2</sup> Table S2 compares the fluidicity and thermodynamic data obtained from the TIP4P/2005 model to those from the SPC/Fw model at ambient condition (1,000 kg/m<sup>3</sup> and 298.15 K). The translational and rotational fluidicity are not significantly affected by the intramolecular vibration at 298.15 K and 1,000 kg/m<sup>3</sup>. The thermodynamic contribution of the intramolecular vibration is quite small compared to the translational and rotational contributions as shown by Pascal et al.<sup>3</sup> and Lin et al.<sup>4</sup> The absolute entropy data are slightly different from Pascal et al.,<sup>3</sup> which could arise from the fact that this work uses the weighting function corrected by Sun et al.<sup>5</sup>

We also conduct simulations at  $T = 654.1 - 2616.4$  K ( $T_{\text{r}} = 1.0 - 4.0$  for the TIP4P/2005 model). Fig. S2 shows that both fluidicity values are slightly higher than those from the TIP4P/2005 model but the overall behavior agrees well. Interestingly, the rotational fluidicity of the flexible water model also does not converge to zero, which suggests that the plastic crystal would also exist in the SPC/Fw model. All these results suggest that

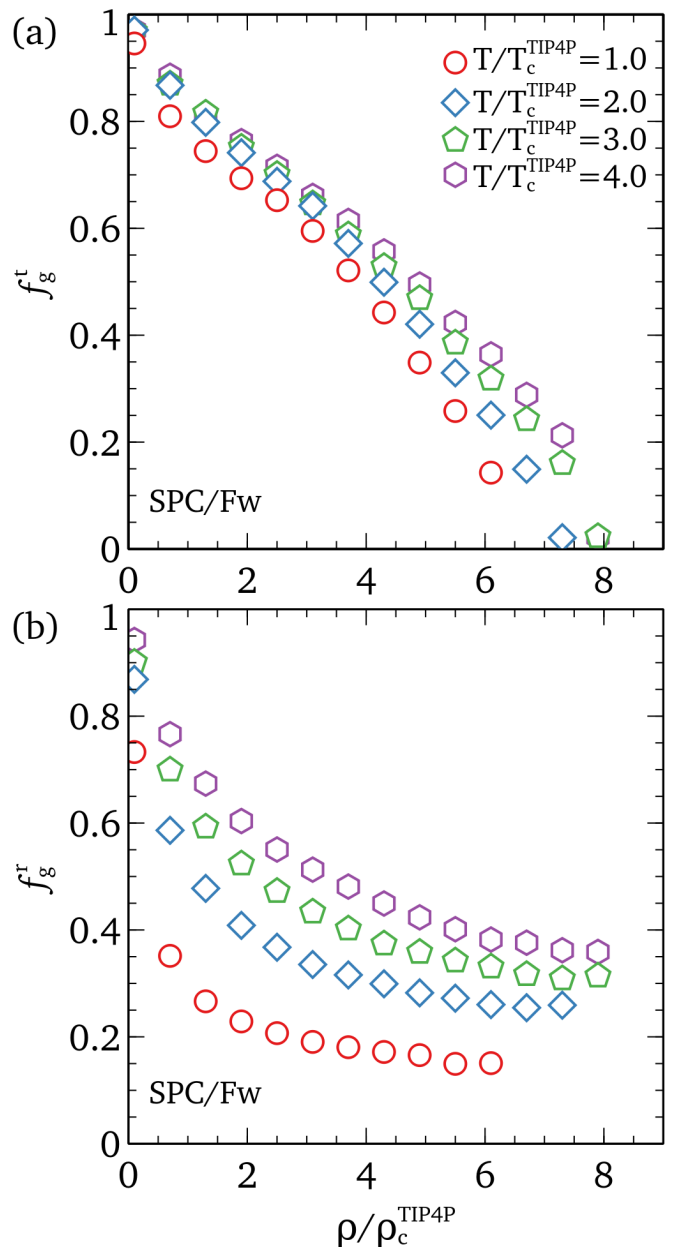

FIG. S2. (a) Translational fluidicity ( $f_{\text{g}}^{\text{t}}$ ) and (b) rotational fluidicity ( $f_{\text{g}}^{\text{r}}$ ) of the SPC/Fw model along isotherms. These fluidicity values are plotted against the reduced density based on the critical density of the TIP4P/2005 model for the direct comparison. The fluidicity data are slightly higher than that obtained from the TIP4P/2005 model (see Fig. 2 in the main article), but the overall behavior does not change despite the change in the model parameters.

the intramolecular vibration would affect thermophysical properties only when the molecular polarizability becomes important but would not have a significant effect on the overall thermodynamic behavior considered in this work.

### D. NVT Simulation Results (TIP4P/2005)

Table S3 describes the variables used in Table S4 and S5. Table S4 shows the structural analysis results including the number of hydrogen bonds following different criteria, the orientational tetrahedral order, and the fraction of face-centered cubic or hexagonal close packed topological types. Table S5 shows the thermodynamic and dynamic data obtained from the 2PT model.

<sup>1</sup>J. L. Abascal and C. Vega, The Journal of chemical physics **123**, 234505 (2005).

<sup>2</sup>Y. Wu, H. L. Tepper, and G. A. Voth, The Journal of chemical physics **124**, 024503 (2006).

<sup>3</sup>T. A. Pascal, D. Schärf, Y. Jung, and T. D. Kühne, The Journal of chemical physics **137**, 244507 (2012).

<sup>4</sup>S.-T. Lin, P. K. Maiti, and W. A. Goddard III, The Journal of Physical Chemistry B **114**, 8191 (2010).

<sup>5</sup>T. Sun, J. Xian, H. Zhang, Z. Zhang, and Y. Zhang, The Journal of chemical physics **147**, 194505 (2017).

TABLE S4: Structural properties from the NVT simulations.

| $\rho$               | $n_{\text{HB}}^{\text{E}}$ | $n_{\text{HB}}^{\text{G}}$ | $n_{\text{HB}}^{\text{G}'}$ | $\langle q \rangle$ | $f_{\text{FCC-HCP}}$ |
|----------------------|----------------------------|----------------------------|-----------------------------|---------------------|----------------------|
| $T_{\text{r}} = 1.0$ |                            |                            |                             |                     |                      |
| 28.423               | 0.174                      | 0.188                      | 0.177                       | -0.267              | 0.018                |
| 113.692              | 0.549                      | 0.618                      | 0.558                       | -0.178              | 0.021                |
| 198.961              | 0.777                      | 0.886                      | 0.786                       | -0.053              | 0.026                |
| 284.23               | 0.938                      | 1.070                      | 0.946                       | 0.022               | 0.030                |
| 369.499              | 1.060                      | 1.212                      | 1.068                       | 0.073               | 0.034                |
| 454.768              | 1.176                      | 1.345                      | 1.184                       | 0.113               | 0.038                |
| 540.037              | 1.291                      | 1.473                      | 1.297                       | 0.143               | 0.043                |
| 625.306              | 1.420                      | 1.619                      | 1.425                       | 0.169               | 0.049                |
| 710.575              | 1.567                      | 1.771                      | 1.570                       | 0.189               | 0.058                |
| 795.844              | 1.733                      | 1.928                      | 1.732                       | 0.205               | 0.069                |
| 881.113              | 1.909                      | 2.085                      | 1.906                       | 0.214               | 0.083                |
| 966.382              | 2.108                      | 2.233                      | 2.101                       | 0.220               | 0.101                |
| 1051.651             | 2.320                      | 2.376                      | 2.309                       | 0.222               | 0.126                |
| 1136.92              | 2.548                      | 2.500                      | 2.533                       | 0.222               | 0.156                |
| 1222.189             | 2.798                      | 2.611                      | 2.779                       | 0.219               | 0.196                |
| 1307.458             | 3.062                      | 2.691                      | 3.042                       | 0.215               | 0.245                |
| 1392.727             | 3.347                      | 2.742                      | 3.325                       | 0.206               | 0.302                |
| 1477.996             | 3.651                      | 2.771                      | 3.629                       | 0.201               | 0.369                |
| 1563.265             | 3.978                      | 2.757                      | 3.955                       | 0.193               | 0.442                |
| 1648.534             | 4.337                      | 2.727                      | 4.315                       | 0.186               | 0.513                |
| 1733.803             | 4.644                      | 2.673                      | 4.623                       | 0.128               | 0.992                |
| 1819.072             | 5.177                      | 2.647                      | 5.165                       | 0.116               | 0.996                |
| $T_{\text{r}} = 2.0$ |                            |                            |                             |                     |                      |
| 28.423               | 0.042                      | 0.029                      | 0.043                       | -0.133              | 0.023                |
| 113.692              | 0.163                      | 0.116                      | 0.165                       | -0.067              | 0.026                |
| 198.961              | 0.281                      | 0.204                      | 0.285                       | -0.004              | 0.031                |
| 284.23               | 0.400                      | 0.293                      | 0.405                       | 0.043               | 0.036                |
| 369.499              | 0.521                      | 0.381                      | 0.528                       | 0.079               | 0.042                |
| 454.768              | 0.651                      | 0.475                      | 0.659                       | 0.107               | 0.048                |
| 540.037              | 0.790                      | 0.576                      | 0.797                       | 0.129               | 0.056                |
| 625.306              | 0.942                      | 0.682                      | 0.951                       | 0.146               | 0.066                |
| 710.575              | 1.108                      | 0.788                      | 1.117                       | 0.158               | 0.076                |
| 795.844              | 1.291                      | 0.906                      | 1.300                       | 0.168               | 0.090                |
| 881.113              | 1.497                      | 1.028                      | 1.505                       | 0.176               | 0.105                |

Continued

| $\rho$               | $n_{\text{HB}}^{\text{E}}$ | $n_{\text{HB}}^{\text{G}}$ | $n_{\text{HB}}^{\text{G}'}$ | $\langle q \rangle$ | $f_{\text{FCC-HCP}}$ |
|----------------------|----------------------------|----------------------------|-----------------------------|---------------------|----------------------|
| 966.382              | 1.719                      | 1.149                      | 1.730                       | 0.180               | 0.123                |
| 1051.651             | 1.966                      | 1.275                      | 1.976                       | 0.183               | 0.145                |
| 1136.92              | 2.236                      | 1.395                      | 2.246                       | 0.184               | 0.170                |
| 1222.189             | 2.533                      | 1.509                      | 2.545                       | 0.185               | 0.199                |
| 1307.458             | 2.852                      | 1.615                      | 2.868                       | 0.183               | 0.233                |
| 1392.727             | 3.199                      | 1.705                      | 3.217                       | 0.181               | 0.273                |
| 1477.996             | 3.562                      | 1.774                      | 3.586                       | 0.177               | 0.318                |
| 1563.265             | 3.960                      | 1.823                      | 3.987                       | 0.173               | 0.368                |
| 1648.534             | 4.374                      | 1.834                      | 4.416                       | 0.171               | 0.419                |
| 1733.803             | 4.813                      | 1.844                      | 4.868                       | 0.167               | 0.477                |
| 1819.072             | 5.279                      | 1.817                      | 5.345                       | 0.162               | 0.536                |
| 1904.341             | 5.723                      | 1.995                      | 5.801                       | 0.129               | 0.996                |
| 1989.61              | 6.471                      | 2.007                      | 6.579                       | 0.093               | 0.997                |
| 2074.879             | 6.961                      | 1.861                      | 7.097                       | 0.076               | 0.999                |
| 2160.148             | 7.698                      | 1.762                      | 7.883                       | 0.064               | 0.994                |
| $T_{\text{r}} = 3.0$ |                            |                            |                             |                     |                      |
| 28.423               | 0.031                      | 0.017                      | 0.032                       | -0.115              | 0.023                |
| 113.692              | 0.126                      | 0.071                      | 0.129                       | -0.046              | 0.028                |
| 198.961              | 0.227                      | 0.127                      | 0.231                       | 0.010               | 0.033                |
| 284.23               | 0.334                      | 0.187                      | 0.340                       | 0.053               | 0.038                |
| 369.499              | 0.447                      | 0.251                      | 0.455                       | 0.083               | 0.044                |
| 454.768              | 0.575                      | 0.320                      | 0.584                       | 0.108               | 0.050                |
| 540.037              | 0.713                      | 0.395                      | 0.725                       | 0.126               | 0.058                |
| 625.306              | 0.867                      | 0.477                      | 0.881                       | 0.142               | 0.067                |
| 710.575              | 1.033                      | 0.557                      | 1.049                       | 0.153               | 0.077                |
| 795.844              | 1.222                      | 0.649                      | 1.242                       | 0.162               | 0.089                |
| 881.113              | 1.431                      | 0.746                      | 1.452                       | 0.168               | 0.103                |
| 966.382              | 1.662                      | 0.845                      | 1.688                       | 0.172               | 0.119                |
| 1051.651             | 1.916                      | 0.945                      | 1.944                       | 0.176               | 0.138                |
| 1136.92              | 2.196                      | 1.045                      | 2.228                       | 0.178               | 0.158                |
| 1222.189             | 2.506                      | 1.141                      | 2.542                       | 0.178               | 0.183                |
| 1307.458             | 2.827                      | 1.230                      | 2.871                       | 0.179               | 0.210                |
| 1392.727             | 3.190                      | 1.316                      | 3.243                       | 0.176               | 0.244                |
| 1477.996             | 3.573                      | 1.388                      | 3.636                       | 0.176               | 0.278                |
| 1563.265             | 3.983                      | 1.439                      | 4.054                       | 0.173               | 0.319                |
| 1648.534             | 4.415                      | 1.481                      | 4.506                       | 0.171               | 0.360                |
| 1733.803             | 4.870                      | 1.506                      | 4.976                       | 0.166               | 0.407                |
| 1819.072             | 5.341                      | 1.499                      | 5.469                       | 0.162               | 0.454                |
| 1904.341             | 5.835                      | 1.477                      | 5.989                       | 0.158               | 0.505                |
| 1989.61              | 6.342                      | 1.428                      | 6.524                       | 0.155               | 0.558                |
| 2074.879             | 7.046                      | 1.671                      | 7.249                       | 0.101               | 0.996                |
| 2160.148             | 7.699                      | 1.577                      | 7.944                       | 0.092               | 0.995                |
| 2245.417             | 8.268                      | 1.453                      | 8.567                       | 0.074               | 0.999                |
| 2330.686             | 8.698                      | 1.239                      | 9.052                       | 0.055               | 0.993                |
| $T_{\text{r}} = 4.0$ |                            |                            |                             |                     |                      |
| 28.423               | 0.028                      | 0.014                      | 0.029                       | -0.108              | 0.024                |
| 113.692              | 0.117                      | 0.056                      | 0.121                       | -0.039              | 0.028                |
| 198.961              | 0.214                      | 0.102                      | 0.219                       | 0.013               | 0.033                |
| 284.23               | 0.318                      | 0.150                      | 0.326                       | 0.053               | 0.038                |
| 369.499              | 0.433                      | 0.203                      | 0.443                       | 0.084               | 0.043                |
| 454.768              | 0.560                      | 0.261                      | 0.573                       | 0.107               | 0.050                |
| 540.037              | 0.702                      | 0.322                      | 0.718                       | 0.125               | 0.057                |
| 625.306              | 0.855                      | 0.391                      | 0.874                       | 0.138               | 0.065                |
| 710.575              | 1.028                      | 0.462                      | 1.051                       | 0.149               | 0.075                |

Continued

| $\rho$               | $n_{\text{HB}}^{\text{E}}$ | $n_{\text{HB}}^{\text{G}}$ | $n_{\text{HB}}^{\text{G}'}$ | $\langle q \rangle$ | $f_{\text{FCC-HCP}}$ |
|----------------------|----------------------------|----------------------------|-----------------------------|---------------------|----------------------|
| 795.844              | 1.220                      | 0.537                      | 1.248                       | 0.158               | 0.086                |
| 881.113              | 1.433                      | 0.620                      | 1.465                       | 0.165               | 0.098                |
| 966.382              | 1.669                      | 0.700                      | 1.705                       | 0.169               | 0.112                |
| 1051.651             | 1.928                      | 0.789                      | 1.971                       | 0.174               | 0.129                |
| 1136.92              | 2.212                      | 0.875                      | 2.264                       | 0.175               | 0.147                |
| 1222.189             | 2.519                      | 0.963                      | 2.577                       | 0.178               | 0.167                |
| 1307.458             | 2.855                      | 1.044                      | 2.923                       | 0.176               | 0.192                |
| 1392.727             | 3.214                      | 1.120                      | 3.296                       | 0.176               | 0.220                |
| 1477.996             | 3.607                      | 1.187                      | 3.698                       | 0.174               | 0.250                |
| 1563.265             | 4.012                      | 1.240                      | 4.121                       | 0.174               | 0.283                |
| 1648.534             | 4.450                      | 1.280                      | 4.577                       | 0.169               | 0.320                |
| 1733.803             | 4.910                      | 1.310                      | 5.056                       | 0.167               | 0.359                |
| 1819.072             | 5.378                      | 1.317                      | 5.555                       | 0.164               | 0.401                |
| 1904.341             | 5.875                      | 1.317                      | 6.078                       | 0.161               | 0.446                |
| 1989.61              | 6.387                      | 1.292                      | 6.628                       | 0.158               | 0.492                |
| 2074.879             | 6.906                      | 1.247                      | 7.184                       | 0.154               | 0.537                |
| 2160.148             | 7.342                      | 1.374                      | 7.631                       | 0.144               | 0.992                |
| 2245.417             | 8.223                      | 1.339                      | 8.570                       | 0.100               | 0.993                |
| 2330.686             | 8.772                      | 1.189                      | 9.180                       | 0.094               | 0.982                |
| $T_{\text{r}} = 5.0$ |                            |                            |                             |                     |                      |
| 28.423               | 0.028                      | 0.012                      | 0.028                       | -0.108              | 0.024                |
| 113.692              | 0.115                      | 0.047                      | 0.119                       | -0.037              | 0.028                |
| 198.961              | 0.213                      | 0.089                      | 0.219                       | 0.014               | 0.033                |
| 284.23               | 0.318                      | 0.133                      | 0.327                       | 0.054               | 0.037                |
| 369.499              | 0.435                      | 0.180                      | 0.447                       | 0.083               | 0.044                |
| 454.768              | 0.563                      | 0.230                      | 0.578                       | 0.107               | 0.049                |
| 540.037              | 0.708                      | 0.287                      | 0.728                       | 0.122               | 0.056                |
| 625.306              | 0.866                      | 0.343                      | 0.891                       | 0.135               | 0.064                |
| 710.575              | 1.044                      | 0.410                      | 1.074                       | 0.147               | 0.073                |
| 795.844              | 1.239                      | 0.477                      | 1.274                       | 0.156               | 0.082                |
| 881.113              | 1.456                      | 0.551                      | 1.498                       | 0.163               | 0.094                |
| 966.382              | 1.693                      | 0.625                      | 1.742                       | 0.168               | 0.107                |
| 1051.651             | 1.956                      | 0.702                      | 2.013                       | 0.172               | 0.122                |
| 1136.92              | 2.242                      | 0.776                      | 2.308                       | 0.173               | 0.138                |
| 1222.189             | 2.554                      | 0.850                      | 2.629                       | 0.176               | 0.158                |
| 1307.458             | 2.888                      | 0.927                      | 2.977                       | 0.176               | 0.178                |
| 1392.727             | 3.256                      | 0.997                      | 3.357                       | 0.176               | 0.202                |
| 1477.996             | 3.639                      | 1.056                      | 3.759                       | 0.176               | 0.228                |
| 1563.265             | 4.055                      | 1.108                      | 4.191                       | 0.174               | 0.257                |
| 1648.534             | 4.481                      | 1.156                      | 4.640                       | 0.172               | 0.289                |
| 1733.803             | 4.944                      | 1.179                      | 5.127                       | 0.169               | 0.324                |
| 1819.072             | 5.417                      | 1.201                      | 5.625                       | 0.167               | 0.361                |
| 1904.341             | 5.905                      | 1.205                      | 6.148                       | 0.164               | 0.403                |
| 1989.61              | 6.413                      | 1.191                      | 6.689                       | 0.161               | 0.444                |
| 2074.879             | 6.928                      | 1.163                      | 7.251                       | 0.156               | 0.486                |
| 2160.148             | 7.460                      | 1.118                      | 7.829                       | 0.154               | 0.530                |
| 2245.417             | 7.985                      | 1.060                      | 8.407                       | 0.150               | 0.578                |
| 2330.686             | 8.794                      | 1.188                      | 9.234                       | 0.083               | 0.997                |
| 2415.955             | 9.353                      | 1.045                      | 9.863                       | 0.080               | 0.990                |
| 2501.224             | 9.869                      | 0.912                      | 10.460                      | 0.077               | 0.988                |

TABLE S5: Thermodynamic and dynamic properties from the *NVT* simulations.

| $\rho$      | p       | E       | H       | S     | A        | G        | $f_g^t$ | $f_g^r$ | $D_t$    | $D_r$   |
|-------------|---------|---------|---------|-------|----------|----------|---------|---------|----------|---------|
| $T_r = 1.0$ |         |         |         |       |          |          |         |         |          |         |
| 28.423      | 0.068   | 12.369  | 16.683  | 0.198 | -117.048 | -112.734 | 0.942   | 0.711   | 840.858  | 497.178 |
| 113.692     | 0.153   | 4.496   | 6.924   | 0.167 | -104.436 | -102.007 | 0.84    | 0.421   | 218.852  | 73.398  |
| 198.961     | 0.175   | 0.013   | 1.594   | 0.153 | -100.016 | -98.435  | 0.792   | 0.331   | 136.603  | 33.848  |
| 284.23      | 0.179   | -2.942  | -1.805  | 0.145 | -97.906  | -96.769  | 0.762   | 0.285   | 103.651  | 22.674  |
| 369.499     | 0.184   | -5.147  | -4.25   | 0.139 | -96.347  | -95.449  | 0.74    | 0.254   | 84.539   | 16.852  |
| 454.768     | 0.206   | -7.098  | -6.283  | 0.135 | -95.582  | -94.767  | 0.715   | 0.232   | 69.755   | 12.62   |
| 540.037     | 0.284   | -8.958  | -8.011  | 0.131 | -94.74   | -93.793  | 0.695   | 0.216   | 59.966   | 10.517  |
| 625.306     | 0.497   | -10.822 | -9.389  | 0.127 | -94.218  | -92.785  | 0.668   | 0.204   | 49.998   | 9.024   |
| 710.575     | 0.97    | -12.676 | -10.217 | 0.124 | -93.617  | -91.158  | 0.643   | 0.192   | 42.534   | 7.68    |
| 795.844     | 1.865   | -14.463 | -10.241 | 0.12  | -92.856  | -88.635  | 0.614   | 0.183   | 35.826   | 6.712   |
| 881.113     | 3.393   | -16.122 | -9.185  | 0.116 | -91.974  | -85.037  | 0.589   | 0.177   | 30.728   | 5.962   |
| 966.382     | 5.815   | -17.571 | -6.731  | 0.112 | -91.056  | -80.216  | 0.546   | 0.17    | 24.225   | 5.42    |
| 1051.651    | 9.428   | -18.76  | -2.61   | 0.109 | -89.832  | -73.682  | 0.509   | 0.166   | 19.686   | 4.909   |
| 1136.92     | 14.586  | -19.628 | 3.484   | 0.105 | -88.224  | -65.112  | 0.465   | 0.162   | 15.356   | 4.698   |
| 1222.189    | 21.728  | -20.113 | 11.915  | 0.101 | -86.055  | -54.027  | 0.422   | 0.155   | 11.964   | 4.254   |
| 1307.458    | 31.323  | -20.147 | 23.013  | 0.097 | -83.423  | -40.263  | 0.372   | 0.153   | 8.792    | 4.083   |
| 1392.727    | 43.965  | -19.643 | 37.227  | 0.093 | -80.148  | -23.278  | 0.32    | 0.151   | 6.216    | 3.881   |
| 1477.996    | 60.303  | -18.535 | 54.968  | 0.088 | -76.057  | -2.554   | 0.264   | 0.146   | 4.079    | 3.578   |
| 1563.265    | 81.093  | -16.735 | 76.718  | 0.083 | -71.204  | 22.25    | 0.209   | 0.144   | 2.504    | 3.388   |
| 1648.534    | 107.348 | -14.115 | 103.196 | 0.078 | -65.252  | 52.059   | 0.149   | 0.138   | 1.292    | 2.982   |
| 1733.803    | 120.114 | -12.246 | 112.561 | 0.074 | -60.677  | 64.129   | 0.014   | 0.161   | 0.019    | 4.088   |
| 1819.072    | 158.676 | -7.941  | 149.205 | 0.071 | -54.056  | 103.091  | 0.016   | 0.156   | 0.024    | 3.722   |
| $T_r = 1.1$ |         |         |         |       |          |          |         |         |          |         |
| 28.423      | 0.08    | 14.858  | 19.925  | 0.206 | -133.203 | -128.136 | 0.948   | 0.736   | 970.15   | 597.504 |
| 113.692     | 0.214   | 8.267   | 11.655  | 0.176 | -118.441 | -115.052 | 0.864   | 0.46    | 269.577  | 89.523  |
| 198.961     | 0.283   | 4.086   | 6.647   | 0.163 | -113.079 | -110.518 | 0.815   | 0.361   | 163.899  | 45.076  |
| 284.23      | 0.334   | 1.033   | 3.153   | 0.154 | -109.955 | -107.835 | 0.782   | 0.312   | 120.545  | 28.745  |
| 369.499     | 0.397   | -1.422  | 0.512   | 0.148 | -107.947 | -106.013 | 0.756   | 0.281   | 96.462   | 21.225  |
| 454.768     | 0.495   | -3.591  | -1.629  | 0.143 | -106.501 | -104.539 | 0.732   | 0.257   | 79.508   | 16.355  |
| 540.037     | 0.679   | -5.635  | -3.37   | 0.138 | -105.204 | -102.938 | 0.707   | 0.237   | 66.497   | 13.338  |
| 625.306     | 1.032   | -7.612  | -4.639  | 0.134 | -104.256 | -101.282 | 0.679   | 0.222   | 55.414   | 11.345  |
| 710.575     | 1.674   | -9.518  | -5.273  | 0.13  | -103.372 | -99.127  | 0.646   | 0.211   | 45.2     | 9.608   |
| 795.844     | 2.767   | -11.321 | -5.058  | 0.126 | -102.218 | -95.955  | 0.619   | 0.205   | 38.42    | 8.568   |
| 881.113     | 4.526   | -12.981 | -3.727  | 0.122 | -100.958 | -91.704  | 0.591   | 0.194   | 32.505   | 7.548   |
| 966.382     | 7.203   | -14.429 | -1.002  | 0.118 | -99.631  | -86.203  | 0.558   | 0.19    | 26.939   | 6.916   |
| 1051.651    | 11.117  | -15.601 | 3.443   | 0.115 | -97.998  | -78.953  | 0.517   | 0.184   | 21.438   | 6.403   |
| 1136.92     | 16.615  | -16.46  | 9.867   | 0.111 | -95.981  | -69.653  | 0.474   | 0.176   | 16.887   | 5.737   |
| 1222.189    | 24.138  | -16.911 | 18.67   | 0.107 | -93.576  | -57.996  | 0.432   | 0.174   | 13.222   | 5.555   |
| 1307.458    | 34.192  | -16.893 | 30.22   | 0.102 | -90.571  | -43.457  | 0.382   | 0.169   | 9.769    | 5.006   |
| 1392.727    | 47.336  | -16.348 | 44.883  | 0.098 | -86.88   | -25.649  | 0.336   | 0.162   | 7.239    | 4.666   |
| 1477.996    | 64.235  | -15.169 | 63.128  | 0.094 | -82.572  | -4.275   | 0.281   | 0.161   | 4.875    | 4.452   |
| 1563.265    | 85.659  | -13.278 | 85.437  | 0.089 | -77.343  | 21.372   | 0.226   | 0.158   | 3.087    | 4.318   |
| 1648.534    | 112.579 | -10.565 | 112.462 | 0.084 | -71.049  | 51.979   | 0.166   | 0.154   | 1.663    | 3.855   |
| 1733.803    | 146.048 | -6.908  | 144.845 | 0.079 | -63.745  | 88.008   | 0.109   | 0.149   | 0.735    | 3.594   |
| $T_r = 1.3$ |         |         |         |       |          |          |         |         |          |         |
| 28.423      | 0.101   | 19.03   | 25.455  | 0.216 | -164.485 | -158.059 | 0.957   | 0.789   | 1205.485 | 821.342 |
| 113.692     | 0.324   | 13.923  | 19.064  | 0.191 | -148.709 | -143.568 | 0.88    | 0.524   | 329.128  | 138.663 |
| 198.961     | 0.493   | 10.181  | 14.647  | 0.177 | -140.633 | -136.167 | 0.835   | 0.424   | 201.526  | 70.649  |
| 284.23      | 0.656   | 7.21    | 11.366  | 0.168 | -135.743 | -131.588 | 0.802   | 0.362   | 146.708  | 42.735  |
| 369.499     | 0.849   | 4.666   | 8.804   | 0.161 | -132.427 | -128.289 | 0.773   | 0.325   | 114.771  | 31.884  |
| 454.768     | 1.116   | 2.371   | 6.79    | 0.155 | -129.391 | -124.972 | 0.751   | 0.303   | 95.331   | 24.711  |
| 540.037     | 1.513   | 0.232   | 5.28    | 0.15  | -127.361 | -122.312 | 0.722   | 0.278   | 77.745   | 19.454  |

Continued on next page

| $\rho$      | p       | E       | H       | S     | A        | G        | $f_g^t$ | $f_g^r$ | $D_t$   | $D_r$   |
|-------------|---------|---------|---------|-------|----------|----------|---------|---------|---------|---------|
| 625.306     | 2.133   | -1.798  | 4.347   | 0.146 | -125.602 | -119.457 | 0.69    | 0.261   | 63.324  | 16.764  |
| 710.575     | 3.098   | -3.712  | 4.143   | 0.141 | -123.589 | -115.734 | 0.665   | 0.249   | 53.996  | 14.236  |
| 795.844     | 4.572   | -5.506  | 4.844   | 0.137 | -121.774 | -111.423 | 0.633   | 0.236   | 44.696  | 12.617  |
| 881.113     | 6.772   | -7.125  | 6.72    | 0.133 | -119.879 | -106.033 | 0.604   | 0.228   | 37.621  | 11.273  |
| 966.382     | 9.955   | -8.528  | 10.03   | 0.129 | -117.861 | -99.304  | 0.565   | 0.221   | 30.298  | 10.076  |
| 1051.651    | 14.436  | -9.647  | 15.083  | 0.124 | -115.497 | -90.767  | 0.53    | 0.212   | 24.836  | 9.294   |
| 1136.92     | 20.605  | -10.412 | 22.239  | 0.12  | -112.876 | -80.226  | 0.489   | 0.206   | 19.854  | 8.77    |
| 1222.189    | 28.864  | -10.785 | 31.761  | 0.116 | -109.716 | -67.171  | 0.447   | 0.2     | 15.569  | 8.067   |
| 1307.458    | 39.759  | -10.662 | 44.121  | 0.112 | -106.097 | -51.313  | 0.392   | 0.194   | 11.236  | 7.143   |
| 1392.727    | 53.863  | -9.985  | 59.688  | 0.108 | -101.731 | -32.057  | 0.35    | 0.189   | 8.561   | 6.698   |
| 1477.996    | 71.82   | -8.673  | 78.868  | 0.103 | -96.655  | -9.113   | 0.302   | 0.184   | 6.168   | 6.29    |
| 1563.265    | 94.411  | -6.621  | 102.181 | 0.099 | -90.802  | 18       | 0.248   | 0.182   | 4.019   | 6.039   |
| 1648.534    | 122.579 | -3.731  | 130.225 | 0.094 | -83.841  | 50.115   | 0.197   | 0.176   | 2.496   | 5.573   |
| 1733.803    | 157.393 | 0.123   | 163.665 | 0.089 | -75.852  | 87.69    | 0.142   | 0.172   | 1.313   | 5.119   |
| $T_r = 1.5$ |         |         |         |       |          |          |         |         |         |         |
| 28.423      | 0.122   | 22.772  | 30.475  | 0.223 | -196.098 | -188.395 | 0.964   | 0.815   | 1496.19 | 1040.16 |
| 113.692     | 0.426   | 18.538  | 25.287  | 0.2   | -177.891 | -171.142 | 0.896   | 0.582   | 403.784 | 204.117 |
| 198.961     | 0.694   | 15.177  | 21.462  | 0.188 | -168.803 | -162.518 | 0.85    | 0.466   | 238.254 | 92.145  |
| 284.23      | 0.974   | 12.359  | 18.531  | 0.178 | -162.251 | -156.079 | 0.819   | 0.406   | 173.267 | 60.755  |
| 369.499     | 1.307   | 9.877   | 16.249  | 0.171 | -157.976 | -151.604 | 0.784   | 0.366   | 130.467 | 43.935  |
| 454.768     | 1.744   | 7.607   | 14.517  | 0.165 | -154.135 | -147.225 | 0.757   | 0.334   | 105.565 | 33.575  |
| 540.037     | 2.352   | 5.482   | 13.328  | 0.159 | -150.909 | -143.063 | 0.73    | 0.315   | 86.922  | 27.101  |
| 625.306     | 3.23    | 3.488   | 12.794  | 0.155 | -148.239 | -138.933 | 0.699   | 0.296   | 71.209  | 22.889  |
| 710.575     | 4.503   | 1.611   | 13.028  | 0.15  | -145.531 | -134.114 | 0.672   | 0.282   | 59.952  | 19.882  |
| 795.844     | 6.342   | -0.12   | 14.238  | 0.146 | -142.877 | -128.52  | 0.641   | 0.266   | 49.727  | 16.856  |
| 881.113     | 8.964   | -1.662  | 16.666  | 0.141 | -140.174 | -121.846 | 0.613   | 0.258   | 42.066  | 15.605  |
| 966.382     | 12.635  | -2.983  | 20.572  | 0.137 | -137.363 | -113.808 | 0.578   | 0.247   | 34.713  | 13.961  |
| 1051.651    | 17.673  | -4.005  | 26.27   | 0.133 | -134.441 | -104.166 | 0.541   | 0.236   | 28.215  | 12.727  |
| 1136.92     | 24.458  | -4.686  | 34.07   | 0.129 | -131.067 | -92.311  | 0.497   | 0.227   | 22.128  | 10.705  |
| 1222.189    | 33.441  | -4.938  | 44.355  | 0.125 | -127.275 | -77.982  | 0.457   | 0.222   | 17.663  | 10.161  |
| 1307.458    | 45.13   | -4.693  | 57.491  | 0.121 | -122.952 | -60.767  | 0.415   | 0.217   | 13.765  | 9.763   |
| 1392.727    | 60.106  | -3.893  | 73.856  | 0.116 | -118.017 | -40.268  | 0.368   | 0.211   | 10.283  | 9.017   |
| 1477.996    | 79.059  | -2.42   | 93.945  | 0.112 | -112.297 | -15.931  | 0.316   | 0.207   | 7.269   | 8.682   |
| 1563.265    | 102.757 | -0.207  | 118.211 | 0.108 | -105.713 | 12.706   | 0.266   | 0.204   | 5.002   | 7.994   |
| 1648.534    | 132.091 | 2.853   | 147.203 | 0.103 | -98.188  | 46.162   | 0.222   | 0.198   | 3.406   | 7.385   |
| 1733.803    | 168.192 | 6.902   | 181.665 | 0.098 | -89.472  | 85.29    | 0.169   | 0.193   | 1.962   | 6.949   |
| $T_r = 2.0$ |         |         |         |       |          |          |         |         |         |         |
| 28.423      | 0.169   | 31.504  | 42.191  | 0.233 | -273.094 | -262.407 | 0.97    | 0.873   | 1982.33 | 1781.85 |
| 113.692     | 0.66    | 28.462  | 38.924  | 0.216 | -253.895 | -243.433 | 0.913   | 0.669   | 540.806 | 347.862 |
| 198.961     | 1.166   | 25.796  | 36.35   | 0.205 | -241.848 | -231.294 | 0.867   | 0.568   | 307.42  | 183.875 |
| 284.23      | 1.733   | 23.398  | 34.382  | 0.196 | -233.272 | -222.288 | 0.828   | 0.503   | 211.617 | 117.525 |
| 369.499     | 2.413   | 21.196  | 32.959  | 0.19  | -226.747 | -214.985 | 0.79    | 0.449   | 156.199 | 78.584  |
| 454.768     | 3.271   | 19.142  | 32.099  | 0.183 | -220.332 | -207.376 | 0.763   | 0.417   | 125.855 | 62.411  |
| 540.037     | 4.389   | 17.212  | 31.853  | 0.177 | -214.686 | -200.045 | 0.735   | 0.386   | 103.062 | 50.079  |
| 625.306     | 5.881   | 15.419  | 32.363  | 0.172 | -209.728 | -192.783 | 0.707   | 0.367   | 85.544  | 42.794  |
| 710.575     | 7.88    | 13.748  | 33.727  | 0.167 | -205.002 | -185.023 | 0.68    | 0.349   | 71.839  | 36.869  |
| 795.844     | 10.577  | 12.252  | 36.195  | 0.163 | -200.615 | -176.671 | 0.648   | 0.33    | 59.354  | 30.596  |
| 881.113     | 14.19   | 10.958  | 39.972  | 0.158 | -195.861 | -166.847 | 0.622   | 0.317   | 50.7    | 27.484  |
| 966.382     | 19.004  | 9.905   | 45.333  | 0.154 | -191.65  | -156.222 | 0.583   | 0.305   | 41      | 24.55   |
| 1051.651    | 25.333  | 9.157   | 52.554  | 0.15  | -186.645 | -143.249 | 0.554   | 0.295   | 34.642  | 21.949  |
| 1136.92     | 33.578  | 8.772   | 61.979  | 0.146 | -181.753 | -128.546 | 0.513   | 0.287   | 27.734  | 20.575  |
| 1222.189    | 44.204  | 8.835   | 73.993  | 0.141 | -176.228 | -111.069 | 0.477   | 0.279   | 22.631  | 19.248  |
| 1307.458    | 57.736  | 9.408   | 88.963  | 0.137 | -170.211 | -90.657  | 0.44    | 0.266   | 18.179  | 16.652  |
| 1392.727    | 74.754  | 10.558  | 107.254 | 0.133 | -163.672 | -66.976  | 0.399   | 0.262   | 14.215  | 16.384  |

Continued on next page

| $\rho$      | p       | E      | H       | S     | A        | G        | $f_g^t$ | $f_g^r$ | $D_t$    | $D_r$   |
|-------------|---------|--------|---------|-------|----------|----------|---------|---------|----------|---------|
| 1477.996    | 95.987  | 12.411 | 129.41  | 0.129 | -156.278 | -39.28   | 0.352   | 0.254   | 10.596   | 14.91   |
| 1563.265    | 122.16  | 15.012 | 155.792 | 0.125 | -148.155 | -7.376   | 0.31    | 0.249   | 7.905    | 13.655  |
| 1648.534    | 154.181 | 18.495 | 186.985 | 0.12  | -138.948 | 29.543   | 0.265   | 0.243   | 5.595    | 12.669  |
| 1733.803    | 193.101 | 22.966 | 223.611 | 0.116 | -128.744 | 71.901   | 0.22    | 0.238   | 3.806    | 12.168  |
| 1819.072    | 240.195 | 28.587 | 266.466 | 0.111 | -117.121 | 120.759  | 0.169   | 0.235   | 2.231    | 11.738  |
| 1904.341    | 258.111 | 29.289 | 273.466 | 0.105 | -108.626 | 135.551  | 0.017   | 0.244   | 0.035    | 12.256  |
| 1989.61     | 315.385 | 36.091 | 321.664 | 0.102 | -97.742  | 187.831  | 0.009   | 0.244   | 0.012    | 12.583  |
| 2074.879    | 395.982 | 46.153 | 389.969 | 0.099 | -82.832  | 260.984  | 0.008   | 0.234   | 0.01     | 10.935  |
| 2160.148    | 481.074 | 56.507 | 457.716 | 0.096 | -68.937  | 332.272  | 0.007   | 0.232   | 0.007    | 10.799  |
| $T_r = 2.5$ |         |        |         |       |          |          |         |         |          |         |
| 28.423      | 0.215   | 39.927 | 53.544  | 0.239 | -351.555 | -337.938 | 0.973   | 0.907   | 2339.955 | 2655.08 |
| 113.692     | 0.878   | 37.536 | 51.453  | 0.225 | -331.107 | -317.19  | 0.92    | 0.736   | 649.371  | 554.427 |
| 198.961     | 1.608   | 35.338 | 49.894  | 0.216 | -317.611 | -303.055 | 0.874   | 0.639   | 361.965  | 274.472 |
| 284.23      | 2.447   | 33.292 | 48.805  | 0.209 | -307.75  | -292.237 | 0.834   | 0.568   | 246.257  | 175.793 |
| 369.499     | 3.46    | 31.385 | 48.256  | 0.202 | -298.802 | -281.931 | 0.798   | 0.526   | 181.913  | 131.62  |
| 454.768     | 4.719   | 29.586 | 48.278  | 0.195 | -289.797 | -271.104 | 0.773   | 0.482   | 147.966  | 100.012 |
| 540.037     | 6.319   | 27.898 | 48.979  | 0.19  | -283.004 | -261.924 | 0.739   | 0.453   | 117.689  | 79.883  |
| 625.306     | 8.383   | 26.347 | 50.499  | 0.185 | -275.836 | -251.684 | 0.713   | 0.43    | 98.26    | 67.293  |
| 710.575     | 11.066  | 24.94  | 52.995  | 0.18  | -269.382 | -241.327 | 0.687   | 0.404   | 82.907   | 58.239  |
| 795.844     | 14.547  | 23.698 | 56.627  | 0.175 | -262.967 | -230.038 | 0.658   | 0.384   | 69.577   | 48.836  |
| 881.113     | 19.074  | 22.669 | 61.668  | 0.171 | -256.875 | -217.877 | 0.627   | 0.369   | 58.155   | 42.133  |
| 966.382     | 24.93   | 21.91  | 68.385  | 0.167 | -250.496 | -204.02  | 0.599   | 0.355   | 49.426   | 38.3    |
| 1051.651    | 32.448  | 21.451 | 77.036  | 0.162 | -244.261 | -188.676 | 0.563   | 0.343   | 40.495   | 35.148  |
| 1136.92     | 42.044  | 21.396 | 88.017  | 0.158 | -237.425 | -170.804 | 0.536   | 0.332   | 34.554   | 31.759  |
| 1222.189    | 54.162  | 21.767 | 101.604 | 0.154 | -230.452 | -150.616 | 0.499   | 0.321   | 28.222   | 27.408  |
| 1307.458    | 69.365  | 22.681 | 118.259 | 0.15  | -222.974 | -127.397 | 0.458   | 0.31    | 22.365   | 27.203  |
| 1392.727    | 88.236  | 24.188 | 138.324 | 0.146 | -214.685 | -100.548 | 0.427   | 0.299   | 18.562   | 24.015  |
| 1477.996    | 111.503 | 26.403 | 162.315 | 0.142 | -205.97  | -70.058  | 0.386   | 0.297   | 14.473   | 22.416  |
| 1563.265    | 139.933 | 29.4   | 190.662 | 0.138 | -196.206 | -34.944  | 0.346   | 0.288   | 11.171   | 20.685  |
| 1648.534    | 174.407 | 33.296 | 223.89  | 0.134 | -185.469 | 5.124    | 0.301   | 0.28    | 8.186    | 19.86   |
| 1733.803    | 215.959 | 38.181 | 262.578 | 0.13  | -173.62  | 50.777   | 0.254   | 0.273   | 5.662    | 18.51   |
| 1819.072    | 265.73  | 44.184 | 307.352 | 0.125 | -160.602 | 102.566  | 0.212   | 0.268   | 3.892    | 16.844  |
| 1904.341    | 325.105 | 51.475 | 359.03  | 0.121 | -146.177 | 161.379  | 0.168   | 0.263   | 2.436    | 16.489  |
| $T_r = 3.0$ |         |        |         |       |          |          |         |         |          |         |
| 28.423      | 0.26    | 48.249 | 64.743  | 0.244 | -430.112 | -413.618 | 0.976   | 0.928   | 2821.29  | 3480.15 |
| 113.692     | 1.09    | 46.276 | 63.554  | 0.232 | -408.357 | -391.08  | 0.923   | 0.788   | 736.053  | 774.001 |
| 198.961     | 2.029   | 44.424 | 62.794  | 0.224 | -396.057 | -377.687 | 0.875   | 0.693   | 400.615  | 397.062 |
| 284.23      | 3.13    | 42.68  | 62.52   | 0.217 | -382.941 | -363.101 | 0.841   | 0.629   | 281.293  | 264.978 |
| 369.499     | 4.461   | 41.024 | 62.775  | 0.21  | -371.621 | -349.87  | 0.811   | 0.576   | 215.043  | 183.812 |
| 454.768     | 6.102   | 39.486 | 63.661  | 0.205 | -362.525 | -338.351 | 0.777   | 0.538   | 166.151  | 140.844 |
| 540.037     | 8.156   | 38.036 | 65.245  | 0.2   | -353.487 | -326.278 | 0.747   | 0.51    | 133.817  | 117.227 |
| 625.306     | 10.757  | 36.729 | 67.72   | 0.194 | -344.904 | -313.914 | 0.721   | 0.482   | 111.956  | 101.858 |
| 710.575     | 14.071  | 35.573 | 71.248  | 0.19  | -336.433 | -300.758 | 0.696   | 0.457   | 95.188   | 83.516  |
| 795.844     | 18.291  | 34.583 | 75.987  | 0.185 | -329.035 | -287.631 | 0.667   | 0.437   | 79.589   | 72.396  |
| 881.113     | 23.675  | 33.84  | 82.247  | 0.181 | -321.609 | -273.202 | 0.632   | 0.415   | 65.222   | 59.947  |
| 966.382     | 30.509  | 33.351 | 90.226  | 0.177 | -313.04  | -256.165 | 0.615   | 0.4     | 58.242   | 54.791  |
| 1051.651    | 39.135  | 33.204 | 100.245 | 0.173 | -305.599 | -238.558 | 0.578   | 0.382   | 47.662   | 48.542  |
| 1136.92     | 49.966  | 33.434 | 112.61  | 0.169 | -297.593 | -218.417 | 0.543   | 0.366   | 39.254   | 42.858  |
| 1222.189    | 63.474  | 34.142 | 127.705 | 0.165 | -288.954 | -195.391 | 0.509   | 0.356   | 32.437   | 39.364  |
| 1307.458    | 80.215  | 35.37  | 145.898 | 0.161 | -279.841 | -169.313 | 0.477   | 0.35    | 27.059   | 37.151  |
| 1392.727    | 100.832 | 37.237 | 167.666 | 0.157 | -270.179 | -139.75  | 0.442   | 0.341   | 22.064   | 33.444  |
| 1477.996    | 125.956 | 39.792 | 193.32  | 0.153 | -259.874 | -106.346 | 0.403   | 0.326   | 17.477   | 30.194  |
| 1563.265    | 156.479 | 43.175 | 223.504 | 0.149 | -248.547 | -68.218  | 0.372   | 0.32    | 14.348   | 29.101  |
| 1648.534    | 193.205 | 47.447 | 258.584 | 0.145 | -236.53  | -25.393  | 0.327   | 0.318   | 10.651   | 27.045  |

Continued on next page

| $\rho$      | p       | E       | H       | S     | A        | G        | $f_g^t$ | $f_g^r$ | $D_t$    | $D_r$   |
|-------------|---------|---------|---------|-------|----------|----------|---------|---------|----------|---------|
| 1733.803    | 237.193 | 52.725  | 299.185 | 0.141 | -223.119 | 23.34    | 0.284   | 0.304   | 7.786    | 24.329  |
| 1819.072    | 289.578 | 59.141  | 345.928 | 0.137 | -208.766 | 78.02    | 0.249   | 0.299   | 5.857    | 22.823  |
| 1904.341    | 351.677 | 66.835  | 399.528 | 0.132 | -192.652 | 140.04   | 0.203   | 0.292   | 3.83     | 22.378  |
| 1989.61     | 424.9   | 75.944  | 460.679 | 0.128 | -175.105 | 209.63   | 0.158   | 0.288   | 2.341    | 21.302  |
| 2074.879    | 444.758 | 75.31   | 461.476 | 0.122 | -163.956 | 222.21   | 0.01    | 0.295   | 0.019    | 22.042  |
| 2160.148    | 536.641 | 86.517  | 534.069 | 0.119 | -146.955 | 300.597  | 0.011   | 0.288   | 0.031    | 20.451  |
| 2245.417    | 648.273 | 100.237 | 620.357 | 0.116 | -127.63  | 392.491  | 0.008   | 0.288   | 0.012    | 20.523  |
| 2330.686    | 795.981 | 118.925 | 734.191 | 0.113 | -103.311 | 511.955  | 0.004   | 0.139   | 0.009    | 18.67   |
| $T_r = 4.0$ |         |         |         |       |          |          |         |         |          |         |
| 28.423      | 0.349   | 64.764  | 86.905  | 0.25  | -590.019 | -567.878 | 0.979   | 0.953   | 3553.385 | 5988.82 |
| 113.692     | 1.499   | 63.346  | 87.105  | 0.241 | -567.5   | -543.74  | 0.929   | 0.848   | 907.827  | 1279.41 |
| 198.961     | 2.838   | 61.988  | 87.689  | 0.235 | -552.107 | -526.406 | 0.886   | 0.774   | 502.869  | 694.121 |
| 284.23      | 4.435   | 60.717  | 88.827  | 0.23  | -540.194 | -512.084 | 0.846   | 0.709   | 334.479  | 450.96  |
| 369.499     | 6.358   | 59.502  | 90.503  | 0.224 | -526.233 | -495.231 | 0.814   | 0.666   | 252.276  | 331.197 |
| 454.768     | 8.714   | 58.396  | 92.915  | 0.218 | -513.224 | -478.705 | 0.785   | 0.626   | 200.506  | 243.196 |
| 540.037     | 11.622  | 57.393  | 96.164  | 0.214 | -502.107 | -463.336 | 0.756   | 0.593   | 162.061  | 207.773 |
| 625.306     | 15.222  | 56.539  | 100.394 | 0.209 | -490.827 | -446.972 | 0.728   | 0.565   | 133.77   | 172.158 |
| 710.575     | 19.705  | 55.844  | 105.801 | 0.205 | -479.737 | -429.78  | 0.707   | 0.532   | 115.785  | 136.838 |
| 795.844     | 25.284  | 55.346  | 112.582 | 0.201 | -470.376 | -413.141 | 0.672   | 0.508   | 94.141   | 121.258 |
| 881.113     | 32.225  | 55.105  | 120.993 | 0.196 | -458.306 | -392.418 | 0.654   | 0.491   | 83.628   | 102.315 |
| 966.382     | 40.838  | 55.164  | 131.295 | 0.192 | -447.754 | -371.623 | 0.626   | 0.474   | 71.009   | 93.309  |
| 1051.651    | 51.486  | 55.558  | 143.757 | 0.188 | -436.933 | -348.734 | 0.603   | 0.453   | 61.834   | 80.544  |
| 1136.92     | 64.59   | 56.379  | 158.727 | 0.185 | -426.766 | -324.417 | 0.562   | 0.439   | 49.666   | 72.881  |
| 1222.189    | 80.646  | 57.678  | 176.553 | 0.181 | -414.874 | -295.999 | 0.54    | 0.428   | 43.594   | 68.13   |
| 1307.458    | 100.213 | 59.553  | 197.636 | 0.177 | -403.223 | -265.139 | 0.505   | 0.412   | 35.957   | 59.885  |
| 1392.727    | 123.944 | 62.064  | 222.389 | 0.173 | -390.895 | -230.57  | 0.473   | 0.399   | 29.919   | 56.146  |
| 1477.996    | 152.518 | 65.295  | 251.2   | 0.169 | -377.519 | -191.614 | 0.443   | 0.383   | 25.063   | 49.216  |
| 1563.265    | 186.796 | 69.366  | 284.634 | 0.165 | -363.506 | -148.239 | 0.403   | 0.38    | 19.857   | 47.395  |
| 1648.534    | 227.659 | 74.356  | 323.144 | 0.162 | -348.596 | -99.807  | 0.367   | 0.37    | 15.821   | 44.433  |
| 1733.803    | 276.062 | 80.365  | 367.213 | 0.158 | -332.598 | -45.75   | 0.331   | 0.357   | 12.377   | 40.059  |
| 1819.072    | 333.199 | 87.546  | 417.534 | 0.154 | -315.204 | 14.783   | 0.291   | 0.354   | 9.323    | 38.525  |
| 1904.341    | 400.294 | 95.988  | 474.673 | 0.15  | -296.406 | 82.278   | 0.254   | 0.347   | 6.958    | 35.862  |
| 1989.61     | 478.857 | 105.865 | 539.457 | 0.146 | -276.154 | 157.438  | 0.219   | 0.338   | 5.079    | 33.508  |
| 2074.879    | 570.462 | 117.321 | 612.631 | 0.142 | -254.157 | 241.154  | 0.177   | 0.334   | 3.298    | 32.96   |
| 2160.148    | 605.296 | 118.012 | 622.821 | 0.136 | -237.107 | 267.703  | 0.021   | 0.334   | 0.069    | 32.159  |
| 2245.417    | 709.079 | 130.14  | 699.047 | 0.132 | -215.347 | 353.559  | 0.016   | 0.329   | 0.043    | 30.689  |
| 2330.686    | 855.291 | 148.472 | 809.583 | 0.13  | -190.425 | 470.686  | 0.007   | 0.322   | 0.011    | 28.685  |
| $T_r = 5.0$ |         |         |         |       |          |          |         |         |          |         |
| 28.423      | 0.439   | 81.204  | 109.023 | 0.256 | -755.434 | -727.615 | 0.98    | 0.966   | 4091.175 | 8342.61 |
| 113.692     | 1.898   | 80.151  | 110.226 | 0.248 | -730.616 | -700.541 | 0.931   | 0.885   | 1039.58  | 1873.29 |
| 198.961     | 3.624   | 79.166  | 111.978 | 0.242 | -712.043 | -679.232 | 0.89    | 0.828   | 582.21   | 1036.96 |
| 284.23      | 5.682   | 78.237  | 114.25  | 0.237 | -696.819 | -660.806 | 0.853   | 0.778   | 392.704  | 667.842 |
| 369.499     | 8.166   | 77.401  | 117.214 | 0.232 | -682.881 | -643.068 | 0.822   | 0.73    | 296.78   | 508.488 |
| 454.768     | 11.187  | 76.657  | 120.975 | 0.228 | -670.209 | -625.891 | 0.79    | 0.691   | 229.97   | 380.999 |
| 540.037     | 14.879  | 76.045  | 125.68  | 0.224 | -655.394 | -605.759 | 0.763   | 0.664   | 187.923  | 316.71  |
| 625.306     | 19.397  | 75.588  | 131.471 | 0.219 | -641.812 | -585.929 | 0.741   | 0.631   | 160.052  | 256.802 |
| 710.575     | 24.957  | 75.316  | 138.591 | 0.216 | -629.683 | -566.408 | 0.713   | 0.6     | 133.13   | 216.161 |
| 795.844     | 31.773  | 75.257  | 147.182 | 0.212 | -616.885 | -544.961 | 0.685   | 0.583   | 111.738  | 186.291 |
| 881.113     | 40.132  | 75.466  | 157.52  | 0.208 | -603.405 | -521.35  | 0.665   | 0.554   | 98.584   | 161.043 |
| 966.382     | 50.363  | 76.013  | 169.9   | 0.204 | -590.123 | -496.236 | 0.64    | 0.537   | 84.816   | 142.293 |
| 1051.651    | 62.838  | 76.904  | 184.549 | 0.2   | -577.539 | -469.894 | 0.611   | 0.518   | 71.819   | 132.21  |
| 1136.92     | 78.007  | 78.271  | 201.879 | 0.196 | -563.877 | -440.269 | 0.587   | 0.499   | 62.629   | 113.283 |
| 1222.189    | 96.357  | 80.124  | 222.157 | 0.193 | -550.348 | -408.316 | 0.558   | 0.479   | 53.201   | 100.955 |
| 1307.458    | 118.492 | 82.577  | 245.846 | 0.189 | -535.738 | -372.469 | 0.531   | 0.466   | 45.651   | 87.723  |

Continued on next page



| $\rho$   | p        | E       | H        | S     | A        | G        | $f_g^t$ | $f_g^r$ | $D_t$  | $D_r$  |
|----------|----------|---------|----------|-------|----------|----------|---------|---------|--------|--------|
| 1392.727 | 145.034  | 85.675  | 273.28   | 0.186 | -521.335 | -333.729 | 0.493   | 0.452   | 37.091 | 80.649 |
| 1477.996 | 176.701  | 89.533  | 304.914  | 0.182 | -505.21  | -289.828 | 0.466   | 0.439   | 31.598 | 76.128 |
| 1563.265 | 214.39   | 94.244  | 341.311  | 0.178 | -488.749 | -241.682 | 0.429   | 0.43    | 25.547 | 71.669 |
| 1648.534 | 258.937  | 99.892  | 382.862  | 0.175 | -471.031 | -188.061 | 0.401   | 0.42    | 21.505 | 67.145 |
| 1733.803 | 311.398  | 106.614 | 430.178  | 0.171 | -452.291 | -128.728 | 0.37    | 0.406   | 17.636 | 58.563 |
| 1819.072 | 372.92   | 114.5   | 483.825  | 0.167 | -432.401 | -63.076  | 0.33    | 0.402   | 13.56  | 57.425 |
| 1904.341 | 444.61   | 123.633 | 544.241  | 0.163 | -411.017 | 9.591    | 0.292   | 0.393   | 10.349 | 55.253 |
| 1989.61  | 528.068  | 134.242 | 612.393  | 0.16  | -388.028 | 90.124   | 0.26    | 0.38    | 8.045  | 46.989 |
| 2074.879 | 624.844  | 146.432 | 688.961  | 0.156 | -363.434 | 179.095  | 0.222   | 0.382   | 5.749  | 49.27  |
| 2160.148 | 736.538  | 160.316 | 774.58   | 0.152 | -337.119 | 277.145  | 0.188   | 0.368   | 4.094  | 44.519 |
| 2245.417 | 843.118  | 172.294 | 848.742  | 0.147 | -307.188 | 369.26   | 0.08    | 0.37    | 1.259  | 44.941 |
| 2330.686 | 889.58   | 173.123 | 860.738  | 0.142 | -291.64  | 395.975  | 0.008   | 0.365   | 0.013  | 42.307 |
| 2415.955 | 1057.275 | 193.661 | 982.052  | 0.139 | -261.213 | 527.178  | 0.013   | 0.357   | 0.032  | 39.352 |
| 2501.224 | 1243.47  | 215.794 | 1111.419 | 0.137 | -230.754 | 664.872  | 0.009   | 0.351   | 0.016  | 37.284 |
